# Supplementary material for: Construction of biocompatible regenerated cellulose/SPI composite beads using high-voltage electrostatic technique
Source: Royal Society of Chemistry journal article supplement (doi:10.1039/c6ra02364a), 2016-01-01
Supplement: c6ra02364a1.pdf [file c6ra02364a1.pdf]

## Supporting information

### Construction of biocompatible regenerated cellulose/SPI composite

#### beads by high-voltage electrostatic technique

Chen Li,<sup>a</sup> Meng He,<sup>b</sup> Zan Tong,<sup>a</sup> Yinping Li,<sup>a</sup> Wen Sheng,<sup>c</sup> Lan Luo,<sup>c</sup> Yu Tong,<sup>a</sup> Hao Yu,<sup>d</sup> Celine Huselstein,<sup>d</sup> and Yun Chen\*<sup>a</sup>

*<sup>a</sup>Department of Biomedical Engineering, School of Basic Medical Sciences, Wuhan University, Wuhan 430071, China. E-mail: yunchen@whu.edu.cn; Fax: +86 27 6875 9142; Tel.: +86 27 6875 9509*

*<sup>b</sup>School of Materials Engineering, Yancheng Institute of Technology, Yancheng 224051, China*

*<sup>c</sup>Department of Medical Images, Gongan County People's Hospital, Gongan 434300, China*

*<sup>d</sup>Ingénierie Moléculaire et Physiopathologie Articulaire (IMoPA), UMR 7365 CNRS – Université de Lorraine, Biopôle, 54505 Vandoeuvre-lès-Nancy, France*

### **Details in the methods for the measurement of FTIR spectra and XRD patterns of RCSB-3-n**

The RCSB-v-n and raw materials (cellulose and SPI powder) were frozen in liquid nitrogen and vacuum-dried at 60 °C for 24 h. The beads were crushed into fine powder and pelletized with KBr into discs samples for measurement by FT-IR spectroscopy over wavelengths from 4000 to 400  $\text{cm}^{-1}$ .

The XRD patterns of the RCSB-v-n and raw materials (cellulose and SPI powder) were collected using an X-ray diffractometer with monochromatic Cu  $K\alpha$  radiation ( $\lambda=1.5418 \text{ \AA}$ ) at 40 kV and 30 mA with a scan rate of 4 °/min. The diffraction angle ranged from 4 to 40°.
